# Supplementary material for: Highly-stable, green-solvent-processable organic thin-film transistors: angular- vs. linear-shaped carbazoledioxazine derivatives
Source: Royal Society of Chemistry journal article supplement (doi:10.1039/c8tc01711e), 2018-01-01
Supplement: c8tc01711e1.pdf [file c8tc01711e1.pdf]

Electronic Supplementary Material (ESI) for Journal of Materials Chemistry C.  
This journal is © The Royal Society of Chemistry 2018

## Supporting Information

### Highly-stable, green-solvent-processable organic thin-film transistors: angular- vs linear-shaped carbazodioxazine derivatives

**Yang Wang\*, Hiroki Tatsumi, Rikuo Otsuka, Takehiko Mori and Tsuyoshi Michinobu\***

*Department of Materials Science and Engineering, Tokyo Institute of Technology,  
2-12-1 Ookayama, Meguro-ku, Tokyo 152-8552, Japan*

\*Corresponding address:

Yang Wang

Tel/Fax: +81-3-5734-2469, E-mail: wang.y.av@m.titech.ac.jp

Tsuyoshi Michinobu

Tel/Fax: +81-3-5734-3774, E-mail: michinobu.t.aa@m.titech.ac.jp

## Content

1. Synthetic details of compounds **1-3**
2. Synthetic protocols towards angular- and linear-type carbazodioxazines (CZ)
3. TGA curves
4. DSC curves
5. Side-view molecular geometry optimized by DFT calculations
6. 1D in-plane profile of GIWAXS
7. Crystal domain sizes illustrated by AFM images
8. Images of **Lin-CZ-T** dissolved in different solvents
9. UV-vis absorption spectra of **Lin-CZ-T** in THF/HEX mixtures
10. NMR spectra
11. MALDI-TOF MS spectra

## 1. Synthetic details of compounds 1-3

All chemicals were purchased from Tokyo Chemical Industry (TCI), Kanto Chemical, and Sigma Aldrich and used as received unless otherwise stated.

### Synthesis of 4-methoxy-2-nitro-1,1'-biphenyl (1)

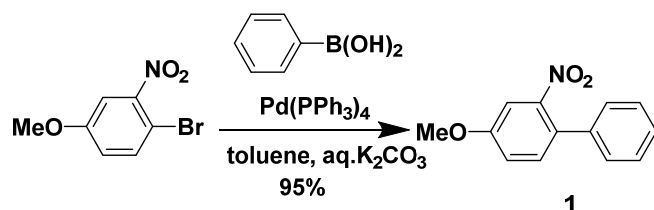

This compound was synthesized using a modified method according to literature<sup>S1</sup>. Under  $\text{N}_2$  atmosphere, phenylboronic acid (3.30 g, 26.7 mmol) and 1-bromo-4-methoxy-2-nitrobenzene (5.00 g, 21.6 mmol) were dissolved in degassed toluene (30 mL). Degassed  $\text{K}_2\text{CO}_3$  aqueous solution (2 M, 25 mL) was then injected by a syringe. Subsequently,  $\text{Pd(PPh}_3)_4$  (0.15 g, 0.13 mmol) was quickly added under  $\text{N}_2$  flow. After stirring overnight at  $110^\circ\text{C}$ , the reaction was quenched with  $\text{H}_2\text{O}$  (100 mL) and the organic phase was extracted with ethyl acetate (150 mL). Evaporation of the solvent followed by column chromatography ( $\text{SiO}_2$ , hexane/ $\text{CH}_2\text{Cl}_2$  = 5:2) afforded the title compound as a yellow solid (4.90 g, 95%).

$^1\text{H}$  NMR (300 MHz,  $\text{CDCl}_3$ ):  $\delta$  = 7.61 (d,  $J$  = 9 Hz, 1H), 7.42-7.39 (m, 4H), 7.30 (t, 6 Hz, 1H), 7.17 (d,  $J$  = 6 Hz, 1H), 7.01 (d,  $J$  = 6 Hz, 1H), 3.90 ppm (s, 3H);  $^{13}\text{C}$  NMR ( $\text{CDCl}_3$ , 75 MHz):  $\delta$  = 159.1, 149.6, 137.3, 135.4, 132.8, 128.6, 128.0, 119.9, 118.6, 110.7, 109.0, 104.5, 56.0 ppm.

### Synthesis of 2-methoxy-9*H*-carbazole (2)

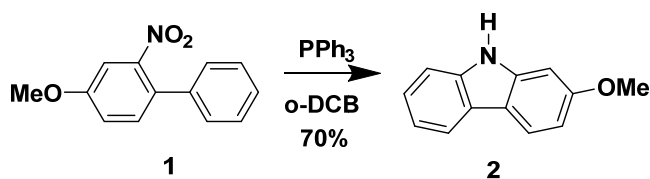

This compound was synthesized using a modified method according to literature<sup>S2</sup>.

Under N<sub>2</sub> atmosphere, 4-methoxy-2-nitro-1,1'-biphenyl (4.00 g, 17.4 mmol) and PPh<sub>3</sub> (11.0 g, 41.9 mmol) were dissolved in 1,2-dichlorobenzene (32 mL). After refluxing overnight, the solvent was removed by reduced pressure. The residue was then purified by column chromatography (SiO<sub>2</sub>, hexane/CH<sub>2</sub>Cl<sub>2</sub> = 5:2) afforded the desired compound as a white solid (2.40 g, 70%).

<sup>1</sup>H NMR (300 MHz, CDCl<sub>3</sub>): δ = 7.90–8.02 (m, 2H), 7.15–7.43 (m, 3H), 6.92 (d, *J* = 2.0 Hz, 1H), 6.88 (dd, *J* = 2.4, 8.5 Hz, 1H), 3.91 ppm (s, 3H).

### Synthesis of 9-(2-decyltetradecyl)-2-methoxy-9*H*-carbazole (3)

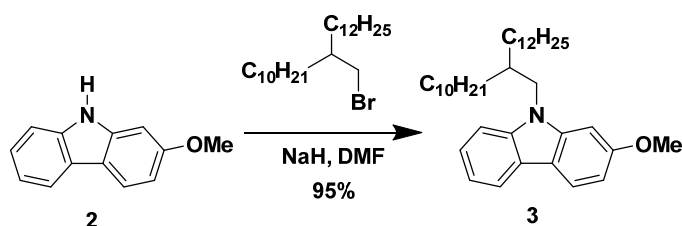

This compound was synthesized using a modified method according to literature<sup>S3</sup>.

Under N<sub>2</sub> atmosphere, 2-methoxy-9*H*-carbazole (4.10 g, 20.8 mmol) was dissolved in dry DMF (45 mL). NaH (1.3 g, 3.3 mmol) was then added quickly under N<sub>2</sub> flow. After stirring for 30 min at room temperature, 2-decyltetradecylbromide (9.60 g, 22.9 mmol) was injected by a syringe. After stirring overnight at room temperature, the reaction mixture was quenched with MeOH (5 mL) and water (100 mL) was added.

The organic phase was extracted with CH<sub>2</sub>Cl<sub>2</sub> (150 mL). Evaporation of the solvent followed by column chromatography (SiO<sub>2</sub>, hexane/CH<sub>2</sub>Cl<sub>2</sub> = 3:1) afforded the desired compound as a white solid (10.6 g, 95%).

<sup>1</sup>H NMR (300 MHz, CDCl<sub>3</sub>): δ = 8.00-7.93 (m, 2H), 7.40-7.31 (m, 2H), 7.20 (t, J = 6.0 Hz, 1H), 6.88-6.82 (m, 2H), 4.04 (s, 2H), 3.90 (s, 3H), 2.10 (br, 1H), 1.50-1.26 (m, 40 H), 0.86 ppm (t, J = 6.0 Hz, 6H); <sup>13</sup>C NMR (75 MHz, CDCl<sub>3</sub>): δ = 159.58, 142.61, 141.75, 124.82, 123.52, 121.41, 120.14, 119.29, 117.15, 109.33, 107.59, 94.01, 55.84, 48.22, 39.94, 36.33, 33.12, 29.95, 27.02, 23.60, 14.47; MALDI-TOF MS (M<sub>w</sub> = 533.87): m/z = 533.77 [M<sup>+</sup>].

## References

- [S1] M. Yuan, L. Chen, J. Wang, S. Chen, K. Wang, Y. Xue, G. Yao, Z. Luo and Y. Zhang, *Org. Lett.*, 2015, **17**, 346-349.
- [S2] A. W. Freeman, M. Urvoy and M. E. Criswell, *J. Org. Chem.*, 2005, **70**, 5014-5019.
- [S3] R. Otsuka, Y. Wang, T. Mori and T. Michinobu, *RSC Adv.*, 2018, **8**, 9822-9832.

## 2. Synthetic protocols towards angular- and linear-type carbazoledioxazines (CZ)

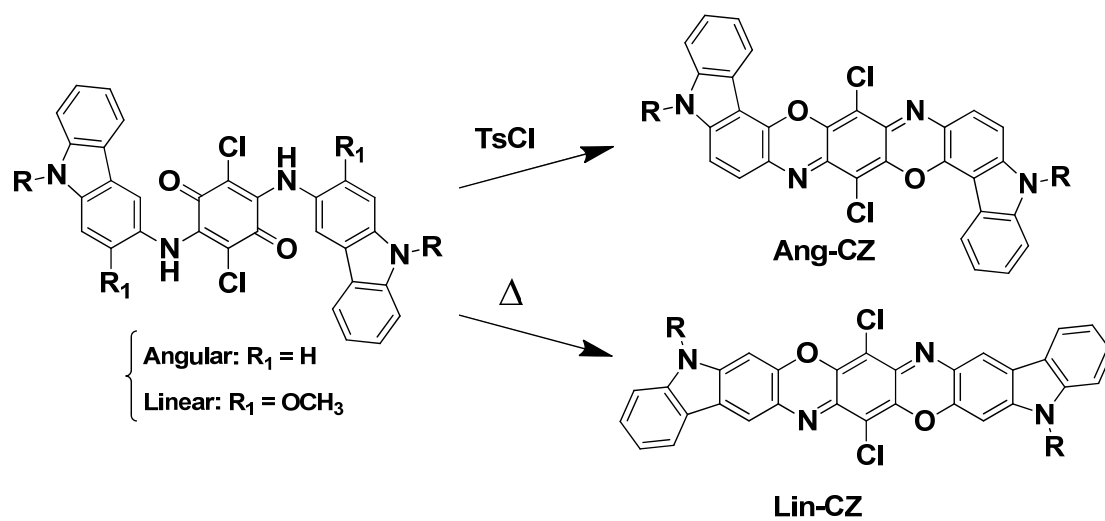

**Scheme S1** Different synthetic protocols towards angular-shaped (**Ang-CZ**) and linear-shaped (**Lin-CZ**) carbazoledioxazine derivatives.

### 3. TGA curves

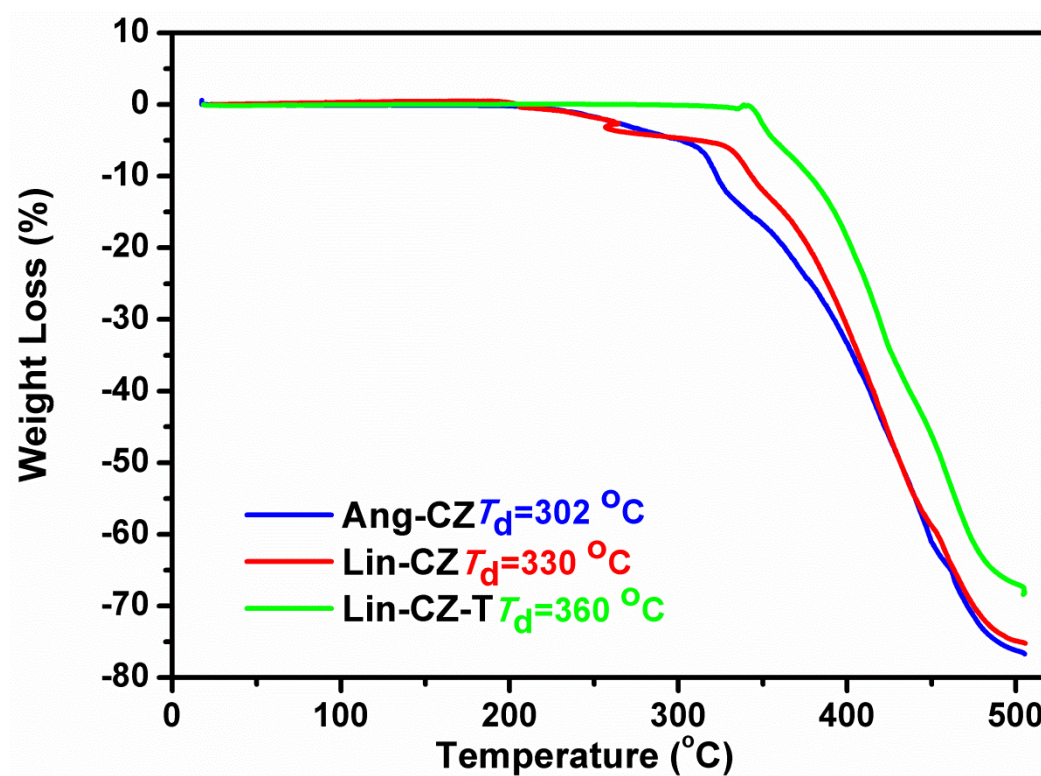

**Fig. S1** Thermogravimetric analysis (TGA) under a nitrogen atmosphere at the heating rate of  $10\text{ }^{\circ}\text{C min}^{-1}$ .

#### 4. DSC curves

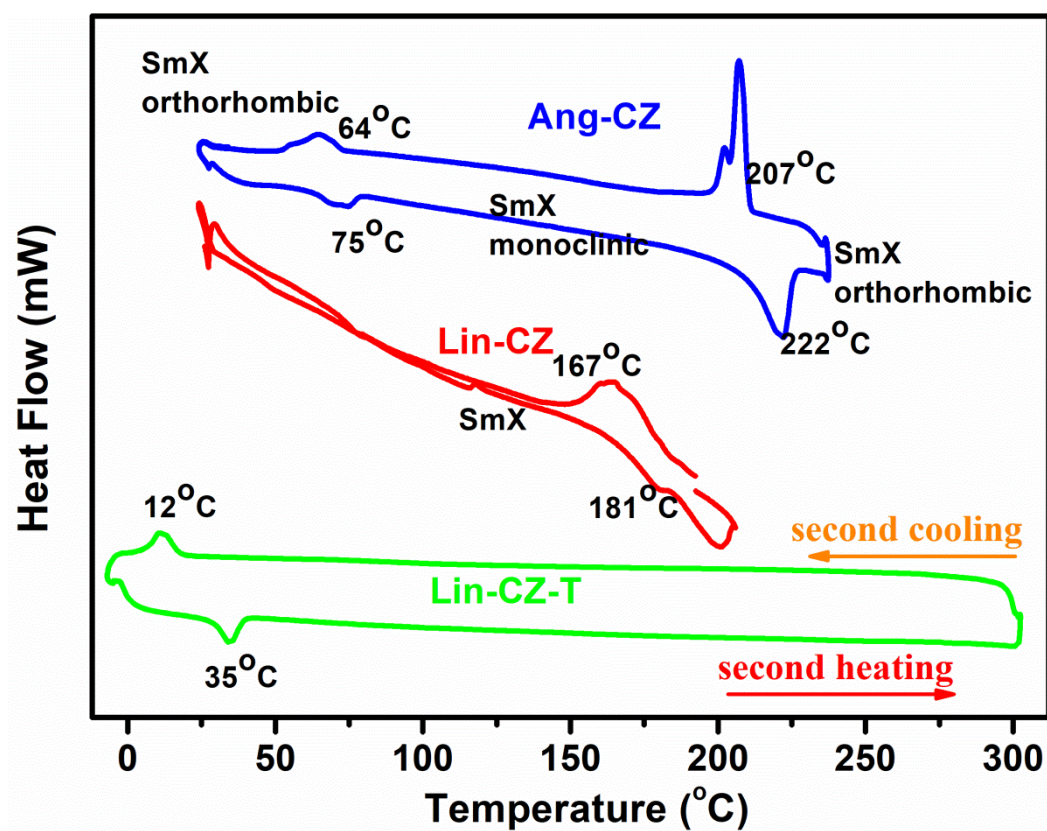

**Fig. S2** Differential scanning calorimetry (DSC) curves of **Ang-CZ**, **Lin-CZ**, and **Lin-CZ-T** at the scanning rate of 10 °C min<sup>-1</sup>.

## 5. Side-view molecular geometry optimized by DFT calculations

(a) **Ang-CZ**

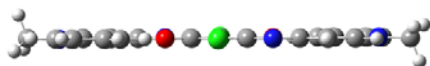

(b) **Lin-CZ**

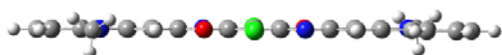

(c) **Lin-CZ-T**

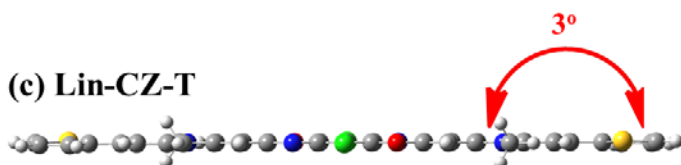

**Fig. S3** Calculated side-view molecular geometry of (a) **Ang-CZ**; (b) **Lin-CZ**; (c) **Lin-CZ-T** (using DFT B3LYP/6-31G(d), long and branched alkyl chains are substituted by the methyl group).



## 6. 1D in-plane profile of GIWAXS

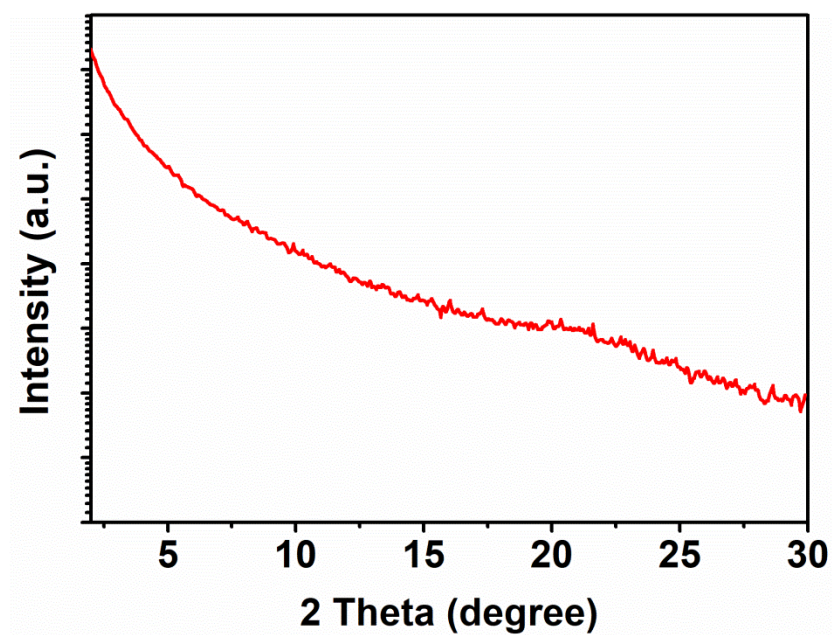

**Fig. S4** The 1D in-plane profile of the GIWAXS of **Lin-CZ**.

## 7. Crystal domain sizes illustrated by AFM images

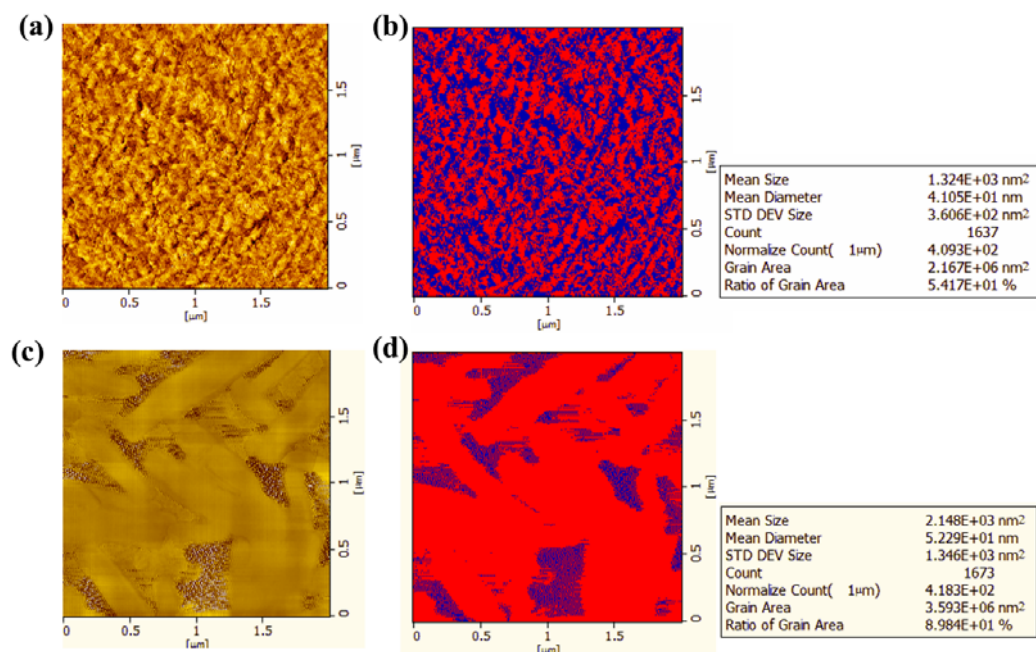

**Fig. S5** The size of the crystal domains illustrated by atomic force microscopy (AFM) images (the films were prepared under the best conditions of TFT performances): (a) phase image and (b) the corresponding domain size of **Ang-CZ**; (c) phase image and (d) the corresponding domain size of **Lin-CZ**.

## 8. Images of Lin-CZ-T dissolved in different solvents

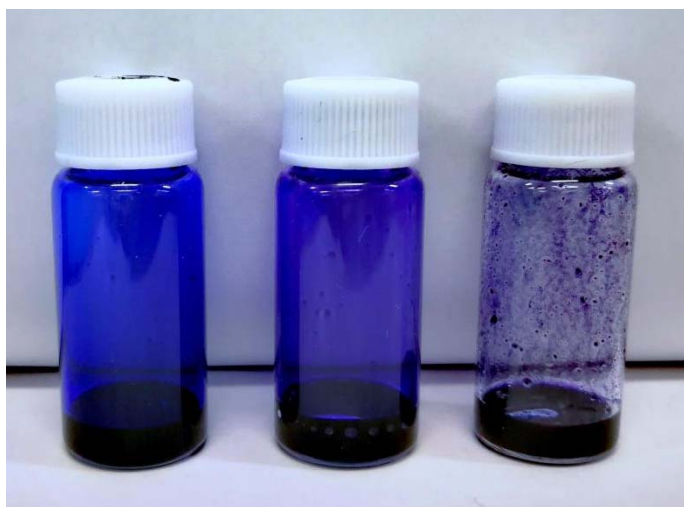

**Fig. S6** Images of **Lin-CZ-T** dissolved in CHCl<sub>3</sub> (left), THF (middle) and hexane (right) at a concentration of 5 mg mL<sup>-1</sup>.

## 9. UV-vis absorption spectra of Lin-CZ-T in THF/HEX mixtures

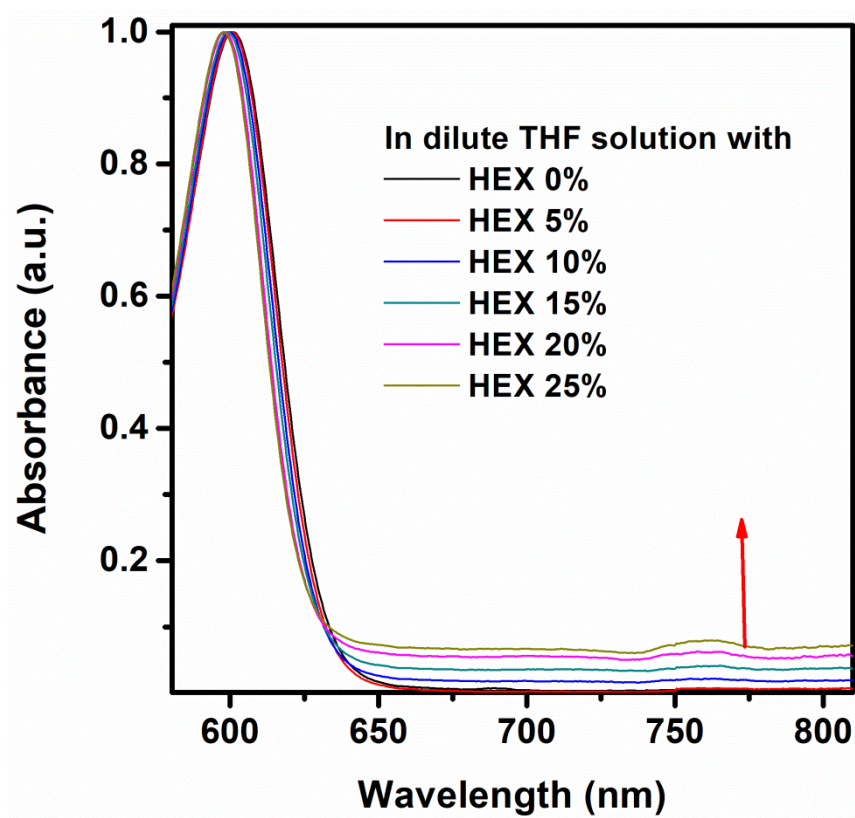

**Fig. S7** UV-vis absorption spectral changes of the diluted solution of **Lin-CZ-T** in tetrahydrofuran (THF) by adding hexane (HEX).

## 10. NMR spectra

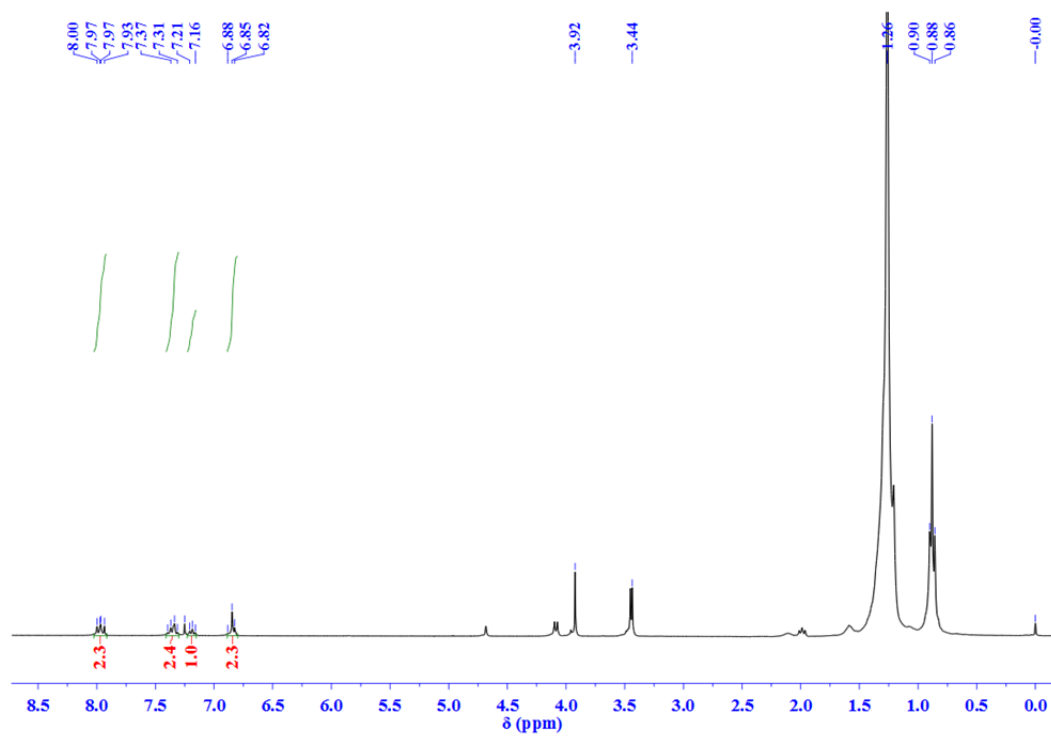

**Fig. S8** <sup>1</sup>H NMR of compound **3** in CDCl<sub>3</sub>.

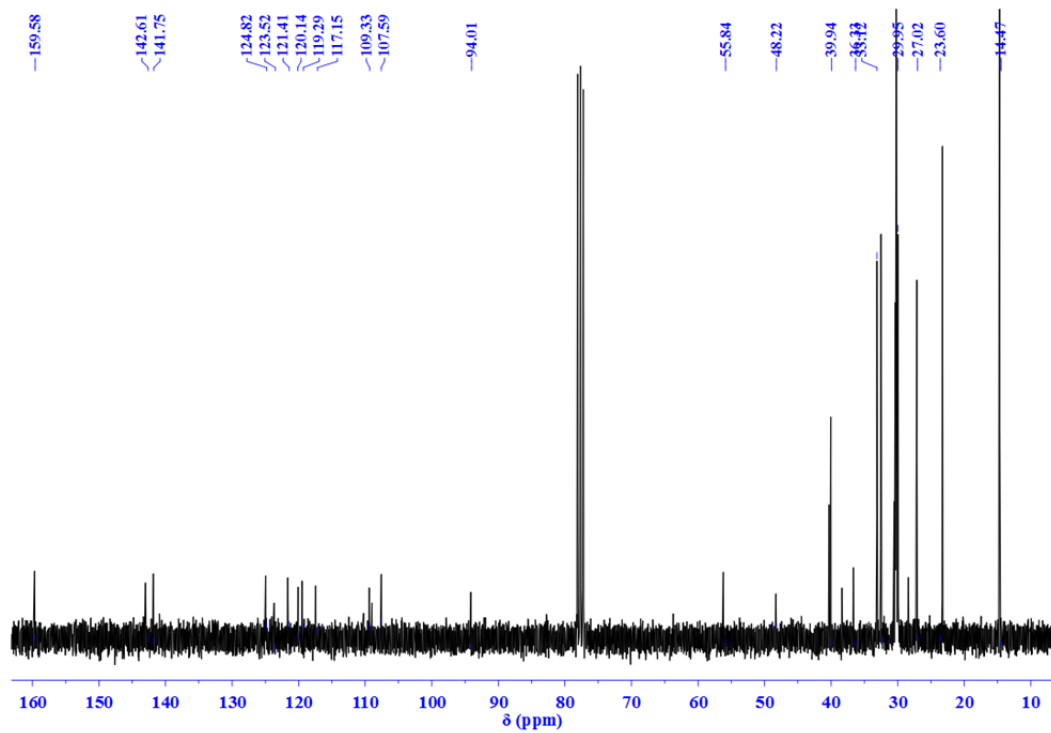

**Fig. S9** <sup>13</sup>C NMR of compound **3** in CDCl<sub>3</sub>.

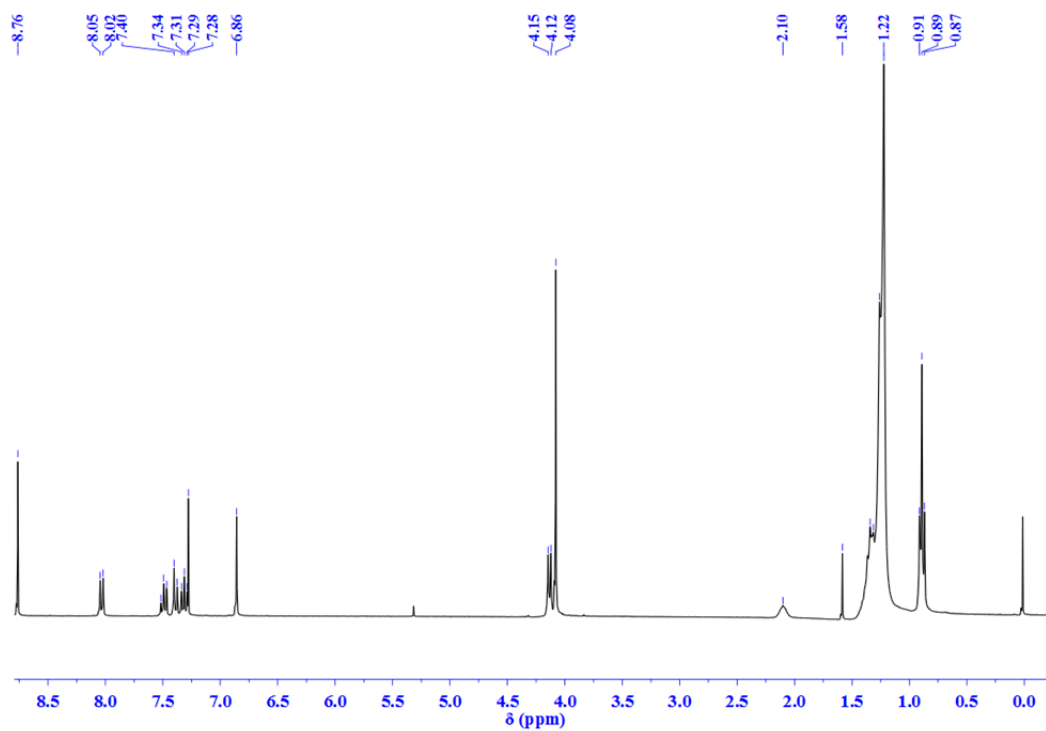

**Fig. S10**  $^1\text{H}$  NMR of compound **4** in  $\text{CDCl}_3$ .

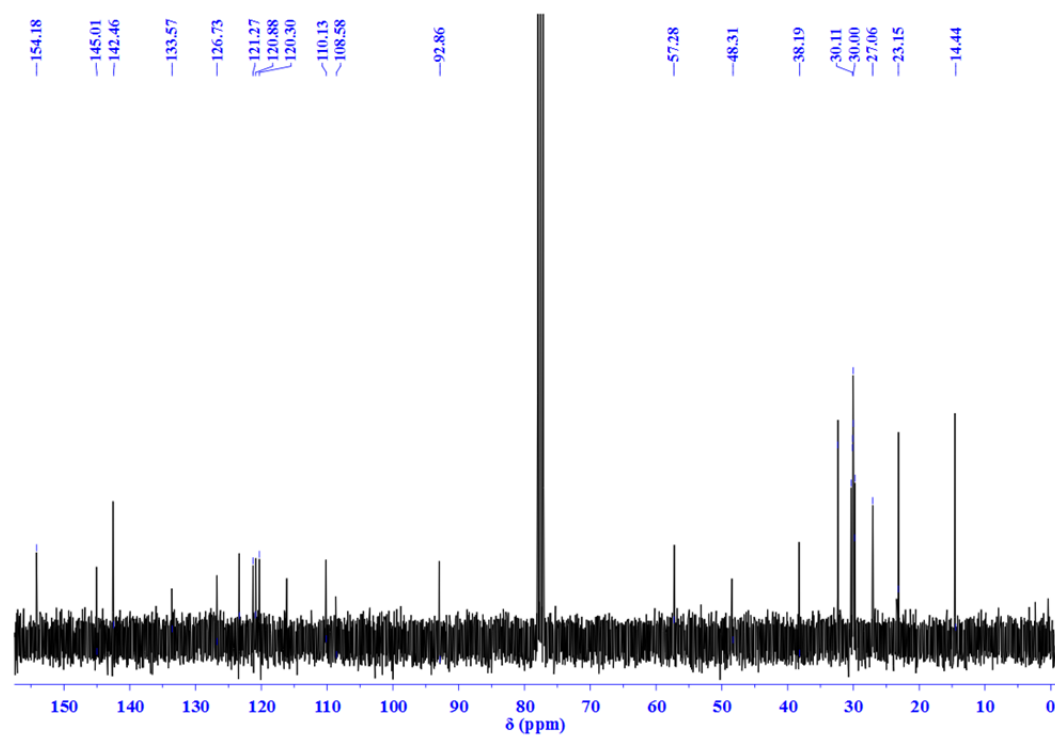

**Fig. S11**  $^{13}\text{C}$  NMR of compound **4** in  $\text{CDCl}_3$ .

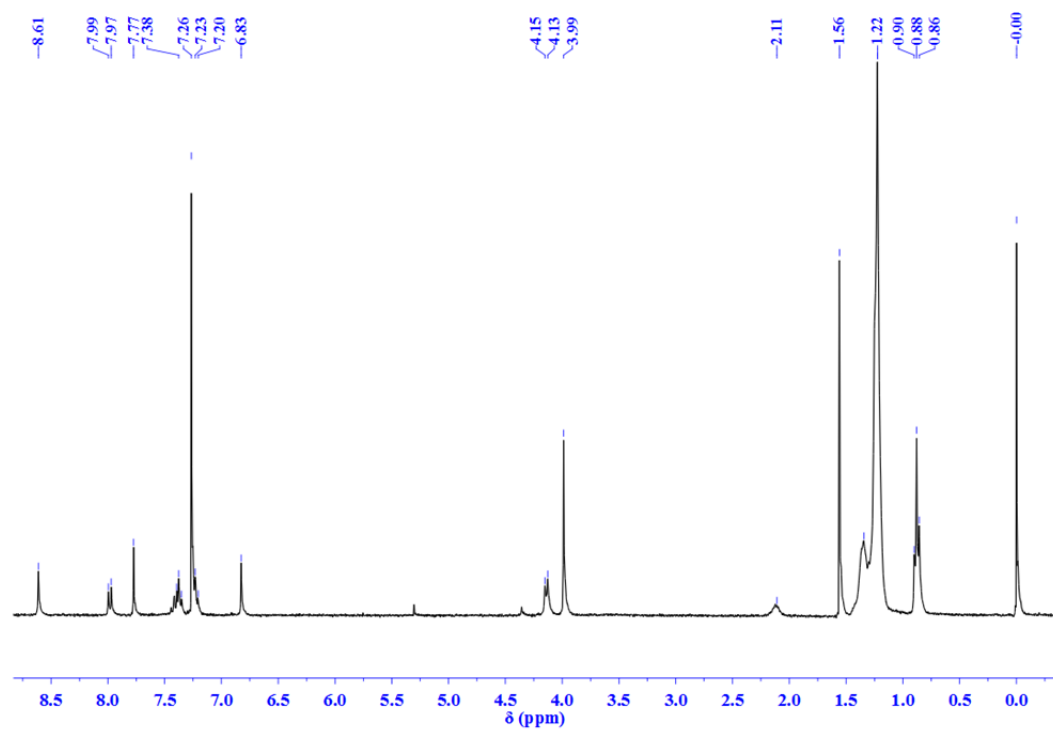

**Fig. S12** <sup>1</sup>H NMR of compound **5** in CDCl<sub>3</sub>.

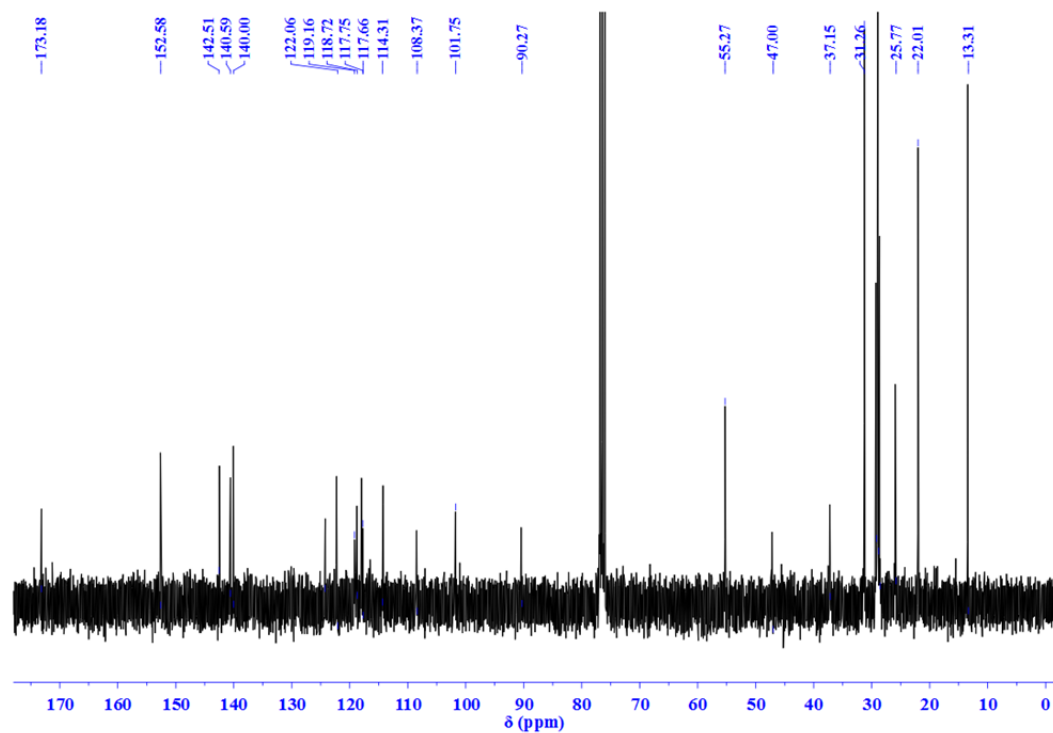

**Fig. S13** <sup>13</sup>C NMR of compound **5** in CDCl<sub>3</sub>.

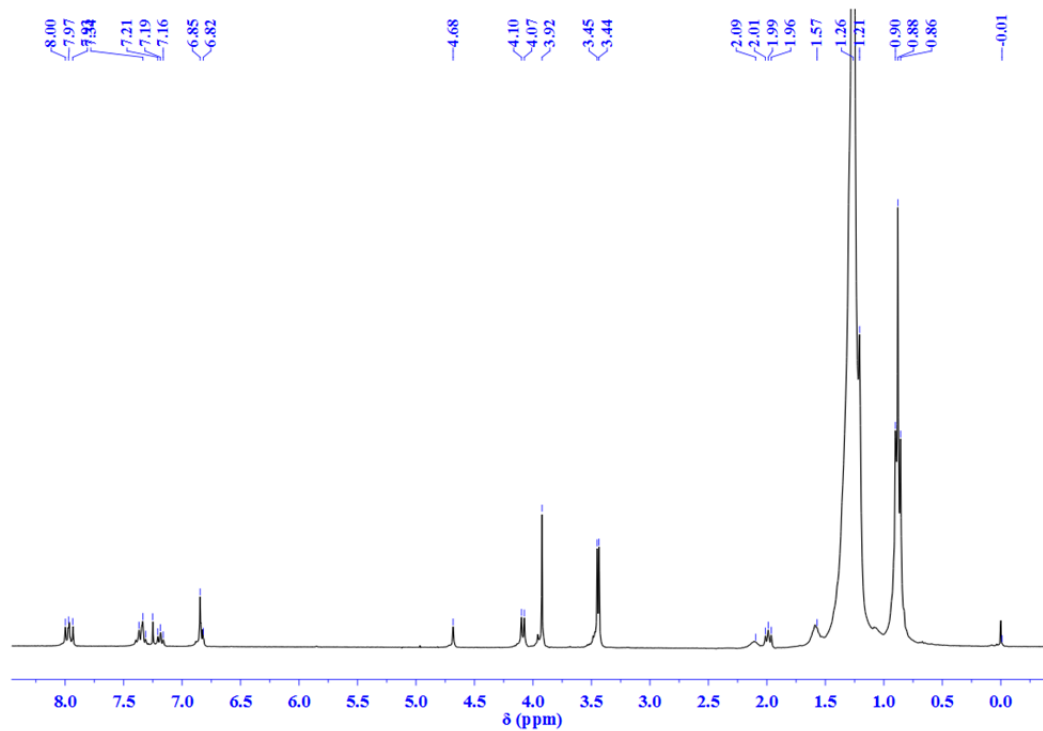

**Fig. S14**  $^1\text{H}$  NMR of **Lin-CZ** in  $\text{CDCl}_3$ .

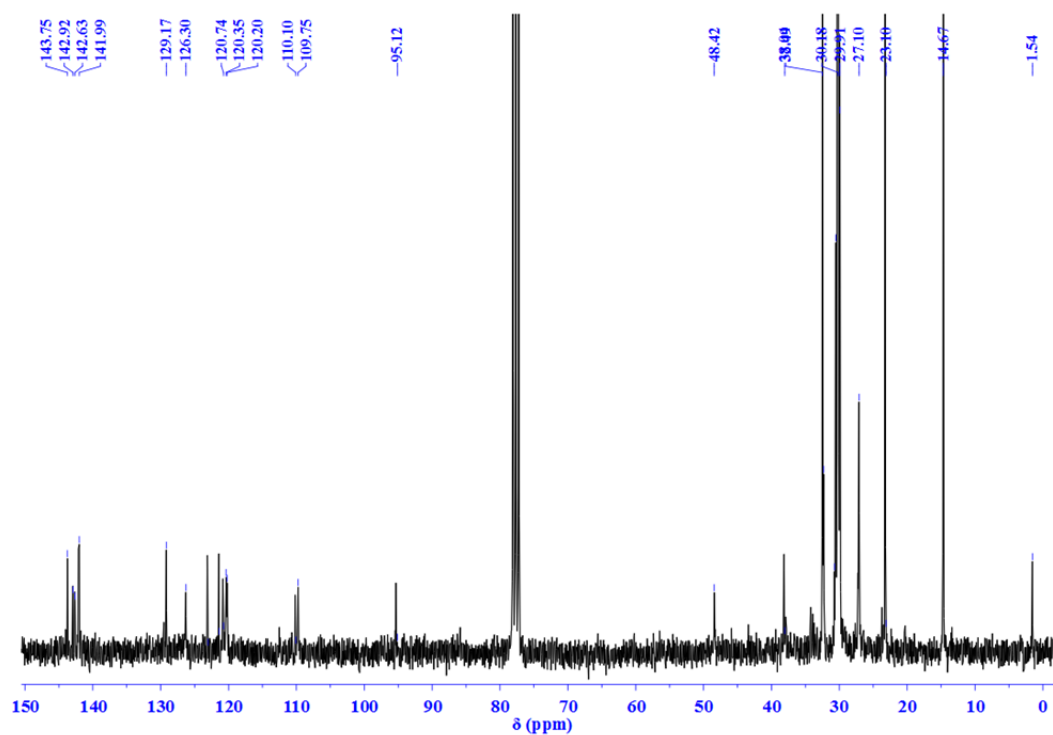

**Fig. S15**  $^{13}\text{C}$  NMR of **Lin-CZ** in  $\text{CDCl}_3$ .



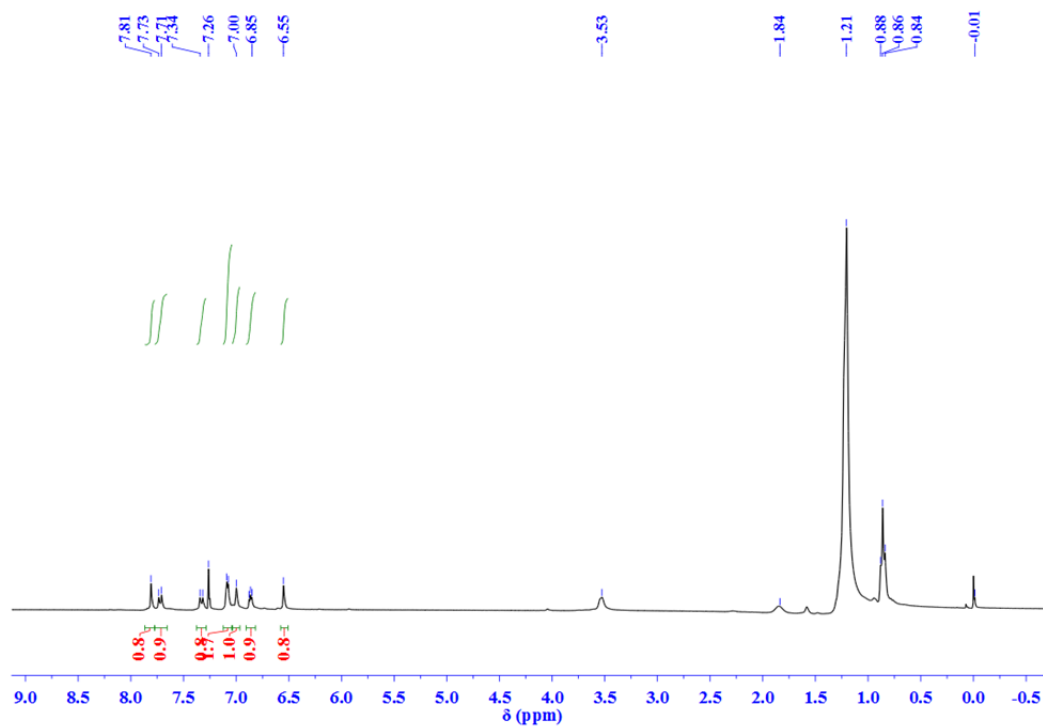

**Fig. S16** <sup>1</sup>H NMR of **Lin-CZ-T** in CDCl<sub>3</sub>.

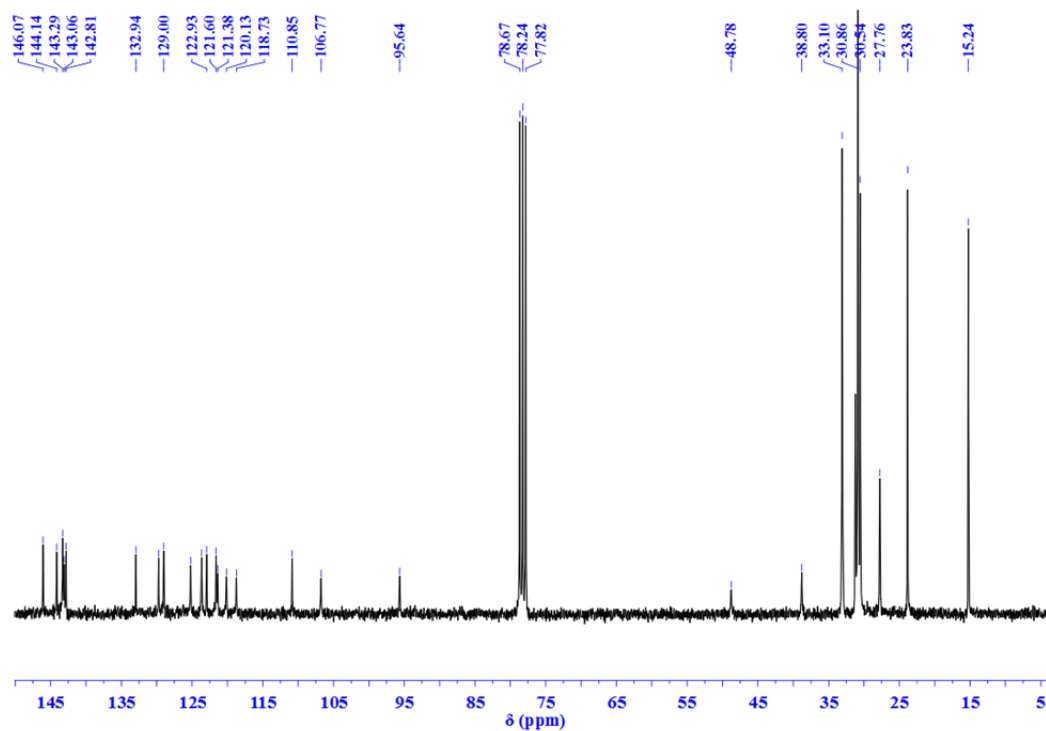

**Fig. S17** <sup>13</sup>C NMR of **Lin-CZ-T** in CDCl<sub>3</sub>.

## 11. MALDI-TOF MS spectra

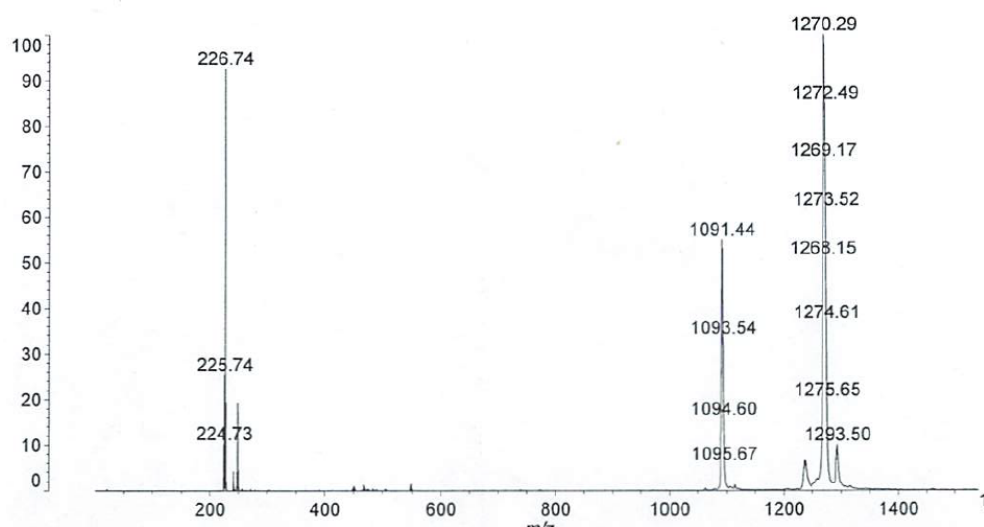

**Fig. S18** MALDI-TOF MS of **5** ( $M_w = 1270.83$ ): found  $m/z = 1270.29$  [ $M^+$ ], using dithranol ( $M_w = 226.23$ ) as a matrix.

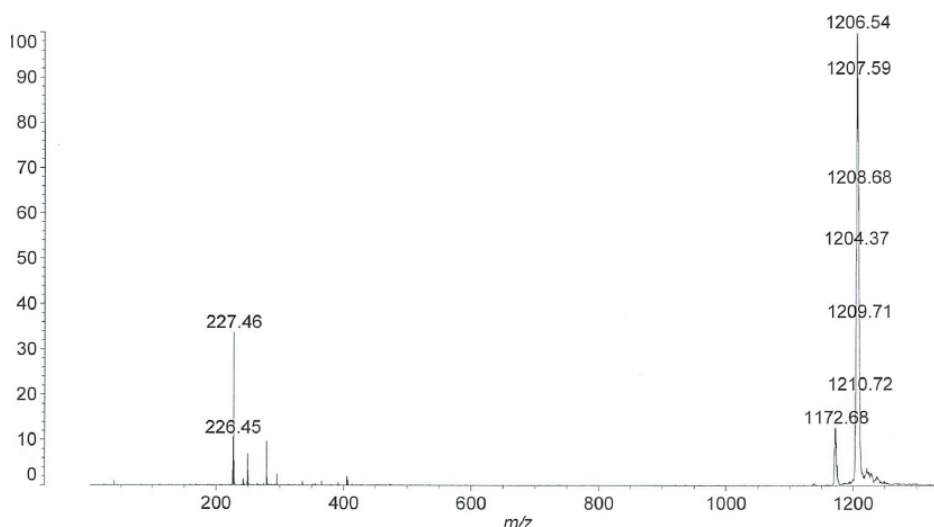

**Fig. S19** MALDI-TOF MS of **Lin-CZ** ( $M_w = 1206.83$ ): found  $m/z = 1206.54$  [ $M^+$ ], using dithranol ( $M_w = 226.23$ ) as a matrix.

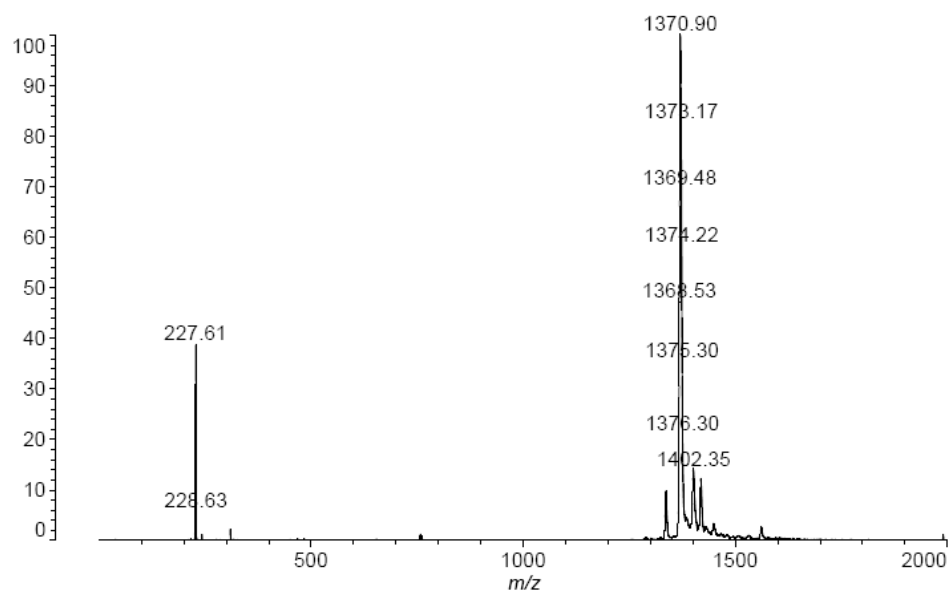

**Fig. S20** MALDI-TOF MS of **Lin-CZ-T** ( $M_w = 1370.89$ ): found  $m/z = 1370.90$  [ $M^+$ ], using dithranol ( $M_w = 226.23$ ) as a matrix.
